# Supplementary material for: Identification of a pyridine derivative of diselenides as a potent inhibitor of the main protease of SARS-CoV-2 through in silico screening and biochemical evaluation
Source: Royal Society of Chemistry journal article supplement (doi:10.1039/d2nj02744e), 2022-01-01
Supplement: d2nj02744e1.pdf [file d2nj02744e1.pdf]

## Identification of pyridine derivative of diselenides as potent inhibitors of main protease of SARS-CoV-2 through *in silico* screening and biochemical evaluation

B. G. Singh<sup>1,3,\*</sup>, V.V. Gandhi<sup>1,3</sup>, P.P. Phadnis<sup>2,3</sup>, A. Kunwar<sup>1,3,\*</sup>

<sup>1</sup>Radiation & Photochemistry Division, <sup>2</sup>Chemistry Division, Bhabha Atomic Research Centre, Mumbai-400085, India

<sup>3</sup>Homi Bhabha National Institute, Anushaktinagar, Mumbai –400094, India

\*Email: [beenam@barc.gov.in](mailto:beenam@barc.gov.in); [kamit@barc.gov.in](mailto:kamit@barc.gov.in)

### Supplementary methods

#### Synthesis of 2, 2'-Diselenobis-(pyridine) [2-C<sub>5</sub>H<sub>4</sub>N-Se]<sub>2</sub> or 2-Py<sub>2</sub>Se<sub>2</sub>:

The above compound was synthesized using method described previously<sup>1</sup>. In a typical experiment, 2-bromopyridine (0.5 g, 31.5 mmol) was added to an aqueous brown solution of Na<sub>2</sub>Se<sub>2</sub> (prepared from selenium powder (2.5 g, 31.67 mmol) in deoxygenated water and sodium borohydride (1.2 g, 31.5 mmol) at 0 °C under nitrogen. The reaction mixture was refluxed for 3 h till the solution became yellow containing a small amount of suspended selenium. The hot reaction mixture was filtered and allowed to cool to room temperature, whereupon dipyridyl diselenide crystallized out as yellow crystals and was filtered using a Buchner funnel to obtain crystalline Py<sub>2</sub>Se<sub>2</sub> (2.03 g, 42%). M.p. 50-51 °C[1a]; (lit 47.5-50[1b,1c]) °C. Anal. Calcd. for C<sub>10</sub>H<sub>8</sub>N<sub>2</sub>Se<sub>2</sub>: Calcd. C, 38.23; H, 2.56; N, 8.92%. Found: C, 37.71; H, 2.45; N, 8.45%. IR (KBr,  $\nu$  cm<sup>-1</sup>): 3047, 1584, 452, 778. <sup>1</sup>H NMR(CDCl<sub>3</sub>)  $\delta$ : 7.07 (1H, t, J = 5.6 Hz, C<sub>5</sub>H<sub>4</sub>), d 7.53 (1H, t, J = 7.4 Hz, C<sub>5</sub>H<sub>4</sub>), d 7.78 (1H, d, J = 7.8 Hz, C<sub>5</sub>H<sub>4</sub>), d 8.44 (1H, d, J = 3.6 Hz, C<sub>5</sub>H<sub>4</sub>); <sup>13</sup>C{<sup>1</sup>H} NMR (CDCl<sub>3</sub>)  $\delta$ : 121.2 (C-5), 123.5 (C-3), 137.5 (C-4), 149.6 (C-6), 154.4 (Se-C); <sup>77</sup>Se{<sup>1</sup>H} NMR (CDCl<sub>3</sub>)  $\delta$ : 447.5 ppm.

#### Synthesis of 2, 2'-Diseleno bis(3-nicotinamide) [2-NC<sub>5</sub>H<sub>3</sub>(3-CONH<sub>2</sub>)Se]<sub>2</sub> or Nic<sub>2</sub>Se<sub>2</sub>:

The above compound was synthesized using method described previously<sup>2</sup>. To an aqueous suspension of elemental Se (0.378 g, 4.788 mmol) in a three-necked round bottom flask, sodium borohydride (0.18 g, 4.788 mmol) was added slowly with stirring resulting into a dark red solution which was refluxed for 30 min. After cooling to room temperature, 2-chloro-3-nicotinamide (0.75 g, 4.788 mmol) (synthesized by reaction 2-chloro-3-nicotinic acid with thionyl chloride (SOCl<sub>2</sub>) followed by addition of liquid NH<sub>3</sub> and filtered on silica column by CHCl<sub>3</sub> eluent) was added slowly with stirring and the solution was refluxed for 5 h till the

yellow-colored clear solution was obtained. The solution was filtered in a beaker and allowed to cool whereupon a yellow solid was separated which was filtered out, washed thoroughly with cold distilled water and dried in vacuo (0.415 g, 43 %). The brownish filtrate remained after this was processed separately. The yellow solid was recrystallized from hot methanol at room temperature to afford yellow crystals of nicotinamide diselenide (0.17 g, 18 %), m. p. 230 °C (decomp). Analysis for nicotinamide diselenide  $C_{12}H_{10}N_4O_2Se_2$ : Calcd: C, 36.02; H, 2.52; N, 14.00%. Found C, 35.47; H, 2.59; N, 14.01%. NMR:  $^1H$  NMR (dms $o$ - $d_6$ )  $\delta$ : 7.28 (dd, 4.6, 7.6 Hz, 2H), 7.83, 8.33 (each br s,  $NH_2$ ), 8.15 (d,d, 1.5, 7.8 Hz, 2H), 8.48 (d,d, 1.5, 4.6 Hz, 2H);  $^{13}C\{^1H\}$  NMR (dms $o$ - $d_6$ )  $\delta$ : 120.0, 128.3 (C-Se), 135.7, 151.8, 160.3 (C-3, py), 168.6 (CO);  $^{77}Se\{^1H\}$  NMR (dms $o$ - $d_6$ )  $\delta$ : 524 ppm. The brownish filtrate was extracted with  $CHCl_3$  and after evaporation of solvent at room temperature the brownish crystalline compound was obtained. It was authenticated as a selone [2-NHC $_5$ H $_3$ (3-CONH $_2$ )Se] analogue of a dinicotinamide diselenide. It was characterized by NMR spectroscopy. It was converted finally to diselenide by aerial oxidation within 2 h. Characterization by NMR:  $^1H$  NMR (dms $o$ - $d_6$ )  $\delta$ : 7.20 (d, d, 4.5, 5.7 Hz, 1H), 7.95 (br s, 2 H,  $NH_2$ ), 7.99 (d, d, 1.5, 4.5 Hz, 1 H), 8.40 (d, d, 1.2, 5.7 Hz, 1H), 9.79 (br s, NH) (resonances for a small concentration of diselenide were also noted since selone oxidizes slowly to diselenide);  $^{13}C\{^1H\}$  NMR (dms $o$ - $d_6$ )  $\delta$ : 116.3, 138.1, 141.6, 141.7, 142.5, 168.4;  $^{77}Se\{^1H\}$  NMR (dms $o$ - $d_6$ )  $\delta$ : 364 ppm.

## References

- (a) A. S. Hodage, C. P. Prabhu, P. P. Phadnis, A. Wadawale, K. I. Priyadarsini and V. K. Jain, Synthesis, characterization, structures and GPx mimicking activity of pyridyl and pyrimidyl based organoselenium compounds, *J. Organomet. Chem.*, 720 (2012) 19-25; (b) F. P. Colonna, G. Distefano, V. Galasso, K. J. Irgolic, G. C. Pappalardo, L. Pope, Dipole moment and helium(I) photoelectron spectroscopic studies of the conformation of di-2-pyridyl and diphenyl dichalcogenides  $R_2X_2$  ( $X = S, Se, \text{ or } Te$ ), *J. Chem. Soc. Perkin Trans-II* (1981) 281-285; (c) A. Toshimitsu, H. Owada, K. Terao, S. Uemura, M. Okano, Pyridylseleno group in organic synthesis. Preparation and oxidation of  $\alpha$ -(2-pyridylseleno) carbonyl compounds leading to  $\alpha$ ,  $\beta$ -unsaturated ketones and aldehydes, *J. Org. Chem.*, 49(1984) 3796-3800.
- M. Raghuraman, P. Verma, A. Kunwar, P. P. Phadnis, V. K. Jain and K. I. Priyadarsini, Cellular evaluation of diselenonicotinamide (DSNA) as a radioprotector against cell death and DNA damage, *Metallomics*, 9 (2017) 715-725.

## Supplementary tables

**Table S1:** The amino acid residues involved in binding of the representative organoselenium compounds with the SARS-CoV-2 M<sup>pro</sup> protein (PDB Code: 6LU7).  represents hydrogen bonding, Vander Waals binding, pi-alkyl interaction, pi-cation attraction interaction, repulsive interaction.

| Sr. Nos | Compounds                        | Amino acid in the receptor site involved in interaction with the compounds          | Nature of interaction between Amino acids and selenium compounds                      |
|---------|----------------------------------|-------------------------------------------------------------------------------------|---------------------------------------------------------------------------------------|
| 1       | Diselenodipropanoic acid (DSePA) | 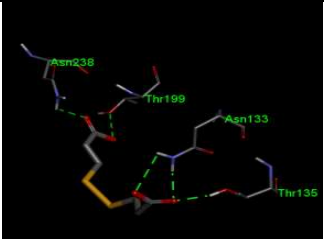  |   |
| 2       | Selenocystine (CysSeSeCys)       |  |  |
| 3       | Selenocystamine (DSePAmine)      |  |  |
| 4       | Methyl selenocysteine (MeSeCys)  |  |  |

|   |                                            |                                                                                     |                                                                                       |
|---|--------------------------------------------|-------------------------------------------------------------------------------------|---------------------------------------------------------------------------------------|
| 5 | Selenomethionine (SeM)                     | 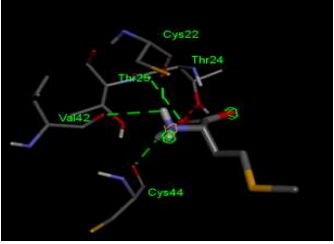   |    |
| 6 | Diselenodiglutathione (GSeSeG)             |    |    |
| 7 | Selenoneine (SeHis)                        |   |   |
| 8 | Diseleno bis (2-Methyl imidazole) (Se-IMZ) |  |  |
| 9 | Diphenyl diselenide (PhSeSePh)             |  |  |

|    |                                  |                                                                                     |                                                                                       |
|----|----------------------------------|-------------------------------------------------------------------------------------|---------------------------------------------------------------------------------------|
| 10 | Dihydroxyl selenolane (DHS)      | 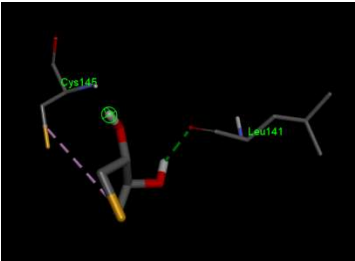   |    |
| 11 | Methaneseleninic acid (MSeA)     |    |    |
| 12 | Selenourea (SeU)                 |   |  |
| 13 | 4-pyridine diselenide (4-Py2Se2) |  |  |
| 14 | Ebselen                          |  |  |

|    |                                        |                                                                                     |                                                                                       |
|----|----------------------------------------|-------------------------------------------------------------------------------------|---------------------------------------------------------------------------------------|
| 15 | 2-nicotinyl selone (2Nict-selone)      | 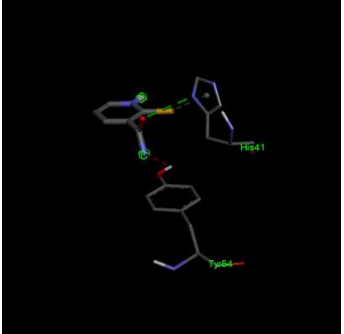   |    |
| 16 | 2-pyridyl selone (2-Pyr-selone)        |    |    |
| 17 | Ebselenol (EbSeH)                      |   |  |
| 18 | 3-Hydroselenopropionic acid (SePA-SeH) |  |  |
| 19 | Selenocysteine (CysSeH)                |  |  |

|    |                                         |                                                                                    |                                                                                     |
|----|-----------------------------------------|------------------------------------------------------------------------------------|-------------------------------------------------------------------------------------|
| 20 | 3-Hydroselenopropanamine (SePAMine-she) | 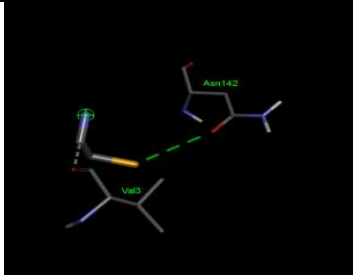  |   |
| 21 | Nicotinamide                            |   |   |
| 22 | ML188                                   |  |  |

**Table S2:** Concentration dependent changes in secondary structure of M<sup>pro</sup> protein by NiCl<sub>2</sub>Se<sub>2</sub> (0.1 μM-2.2 μM) in terms of % distribution of peptide chains in various secondary structures (helix, parallel/anti parallel sheets, beta-turns and random coils) at various wavelengths ranges (200-260 nm, 205-260 nm and 210-260 nm).

| S.N. | Sample                                                              |                  | 200-260 nm     | 205-260 nm     | 210-260 nm     |
|------|---------------------------------------------------------------------|------------------|----------------|----------------|----------------|
| 1.   | Native M <sup>pro</sup> protein                                     | Helix            | 89.7 %         | 89.4 %         | 94.1 %         |
|      |                                                                     | Antiparallel     | 0.7 %          | 1.2 %          | 0.6 %          |
|      |                                                                     | Parallel         | 1.5 %          | 1.1 %          | 1.0 %          |
|      |                                                                     | Beta-Turn        | 7.1 %          | 8.3 %          | 6.8 %          |
|      |                                                                     | Rndm. Coil       | 10.3 %         | 6.6 %          | 4.5 %          |
|      |                                                                     | <b>Total Sum</b> | <b>109.2 %</b> | <b>106.5 %</b> | <b>106.9 %</b> |
| 2.   | M <sup>pro</sup> protein + 0.1 μM NiCl <sub>2</sub> Se <sub>2</sub> | Helix            | 84.0 %         | 84.1 %         | 91.2 %         |
|      |                                                                     | Antiparallel     | 1.0 %          | 1.6 %          | 0.8 %          |
|      |                                                                     | Parallel         | 2.1 %          | 1.5 %          | 1.3 %          |
|      |                                                                     | Beta-Turn        | 8.1 %          | 9.3 %          | 7.6 %          |
|      |                                                                     | Rndm. Coil       | 13.8 %         | 8.9 %          | 6.0 %          |
|      |                                                                     | <b>Total Sum</b> | <b>109.1 %</b> | <b>105.5 %</b> | <b>106.8 %</b> |
| 3.   | M <sup>pro</sup> protein + 0.3 μM NiCl <sub>2</sub> Se <sub>2</sub> | Helix            | 78.4 %         | 73.3 %         | 83.5 %         |
|      |                                                                     | Antiparallel     | 1.4 %          | 2.5 %          | 1.4 %          |
|      |                                                                     | Parallel         | 2.9 %          | 2.6 %          | 2.0 %          |
|      |                                                                     | Beta-Turn        | 9.0 %          | 10.9 %         | 9.2 %          |
|      |                                                                     | Rndm. Coil       | 18.0 %         | 13.4 %         | 9.3 %          |
|      |                                                                     | <b>Total Sum</b> | <b>109.7 %</b> | <b>102.7 %</b> | <b>105.5 %</b> |
| 4.   | M <sup>pro</sup> protein + 0.7 μM NiCl <sub>2</sub> Se <sub>2</sub> | Helix            | 58.9 %         | 53.2 %         | 65.2 %         |
|      |                                                                     | Antiparallel     | 3.1 %          | 4.5 %          | 3.0 %          |
|      |                                                                     | Parallel         | 5.3 %          | 5.0 %          | 3.8 %          |
|      |                                                                     | Beta-Turn        | 11.7 %         | 13.5 %         | 12.0 %         |
|      |                                                                     | Rndm. Coil       | 27.8 %         | 22.5 %         | 16.8 %         |
|      |                                                                     | <b>Total Sum</b> | <b>106.8 %</b> | <b>98.6 %</b>  | <b>100.8 %</b> |
| 5.   | M <sup>pro</sup> protein + 1 μM NiCl <sub>2</sub> Se <sub>2</sub>   | Helix            | 78.4 %         | 73.3 %         | 83.5 %         |
|      |                                                                     | Antiparallel     | 1.4 %          | 2.5 %          | 1.4 %          |
|      |                                                                     | Parallel         | 2.9 %          | 2.6 %          | 2.0 %          |
|      |                                                                     | Beta-Turn        | 9.0 %          | 10.9 %         | 9.2 %          |
|      |                                                                     | Rndm. Coil       | 18.0 %         | 13.4 %         | 9.3 %          |
|      |                                                                     | <b>Total Sum</b> | <b>109.7 %</b> | <b>102.7 %</b> | <b>105.5 %</b> |
| 6.   | M <sup>pro</sup> protein + 1.3 μM NiCl <sub>2</sub> Se <sub>2</sub> | Helix            | 30.9 %         | 24.8 %         | 30.4 %         |
|      |                                                                     | Antiparallel     | 8.1 %          | 9.9 %          | 9.0 %          |
|      |                                                                     | Parallel         | 11.1 %         | 12.1 %         | 9.3 %          |
|      |                                                                     | Beta-Turn        | 16.2 %         | 17.9 %         | 17.3 %         |
|      |                                                                     | Rndm. Coil       | 43.5 %         | 41.0 %         | 35.1 %         |
|      |                                                                     | <b>Total Sum</b> | <b>109.8 %</b> | <b>105.7 %</b> | <b>101.0 %</b> |
| 7.   | M <sup>pro</sup> protein + 1.6 μM NiCl <sub>2</sub> Se <sub>2</sub> | Helix            | 31.3 %         | 27.3 %         | 31.5 %         |
|      |                                                                     | Antiparallel     | 8.3 %          | 9.2 %          | 8.7 %          |
|      |                                                                     | Parallel         | 10.5 %         | 11.0 %         | 9.1 %          |
|      |                                                                     | Beta-Turn        | 16.4 %         | 17.5 %         | 17.1 %         |
|      |                                                                     | Rndm. Coil       | 40.4 %         | 38.5 %         | 34.3 %         |
|      |                                                                     | <b>Total Sum</b> | <b>106.9 %</b> | <b>103.6 %</b> | <b>100.7 %</b> |
| 8.   | M <sup>pro</sup> protein + 2.2 μM NiCl <sub>2</sub> Se <sub>2</sub> | Helix            | 27.1 %         | 24.2 %         | 27.9 %         |
|      |                                                                     | Antiparallel     | 9.6 %          | 10.2 %         | 9.8 %          |
|      |                                                                     | Parallel         | 11.9 %         | 12.4 %         | 10.0 %         |
|      |                                                                     | Beta-Turn        | 17.1 %         | 18.1 %         | 17.8 %         |
|      |                                                                     | Rndm. Coil       | 43.8 %         | 41.5 %         | 37.0 %         |
|      |                                                                     | <b>Total Sum</b> | <b>109.5 %</b> | <b>106.2 %</b> | <b>102.5 %</b> |



## Supplementary Figures

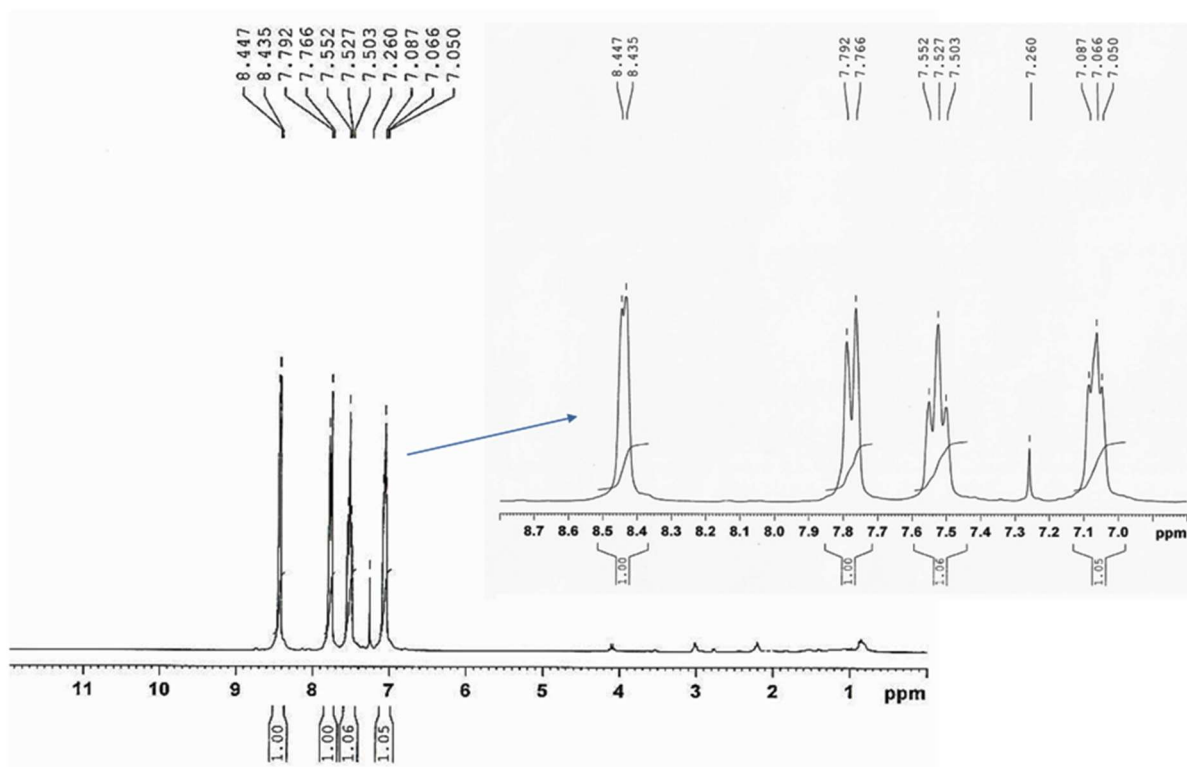

**Fig. S1.** NMR spectra ( $^1\text{H}$ ) of 2, 2'-diselenobis (pyridine) ( $[\text{2-C}_5\text{H}_4\text{N-Se}]_2$ )

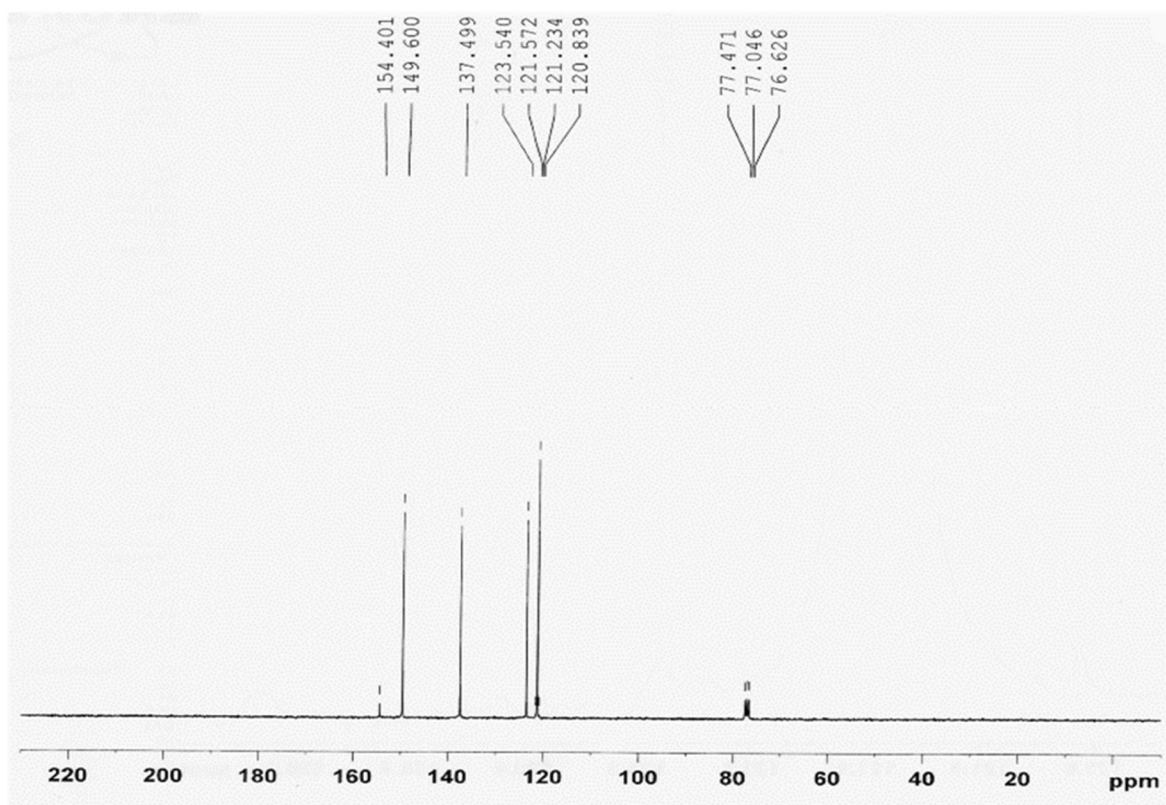

**Fig. S2.** NMR spectra ( $^{13}\text{C}\{^1\text{H}\}$ ) of 2, 2'-diselenobis (pyridine) ( $[\text{2-C}_5\text{H}_4\text{N-Se}]_2$ )

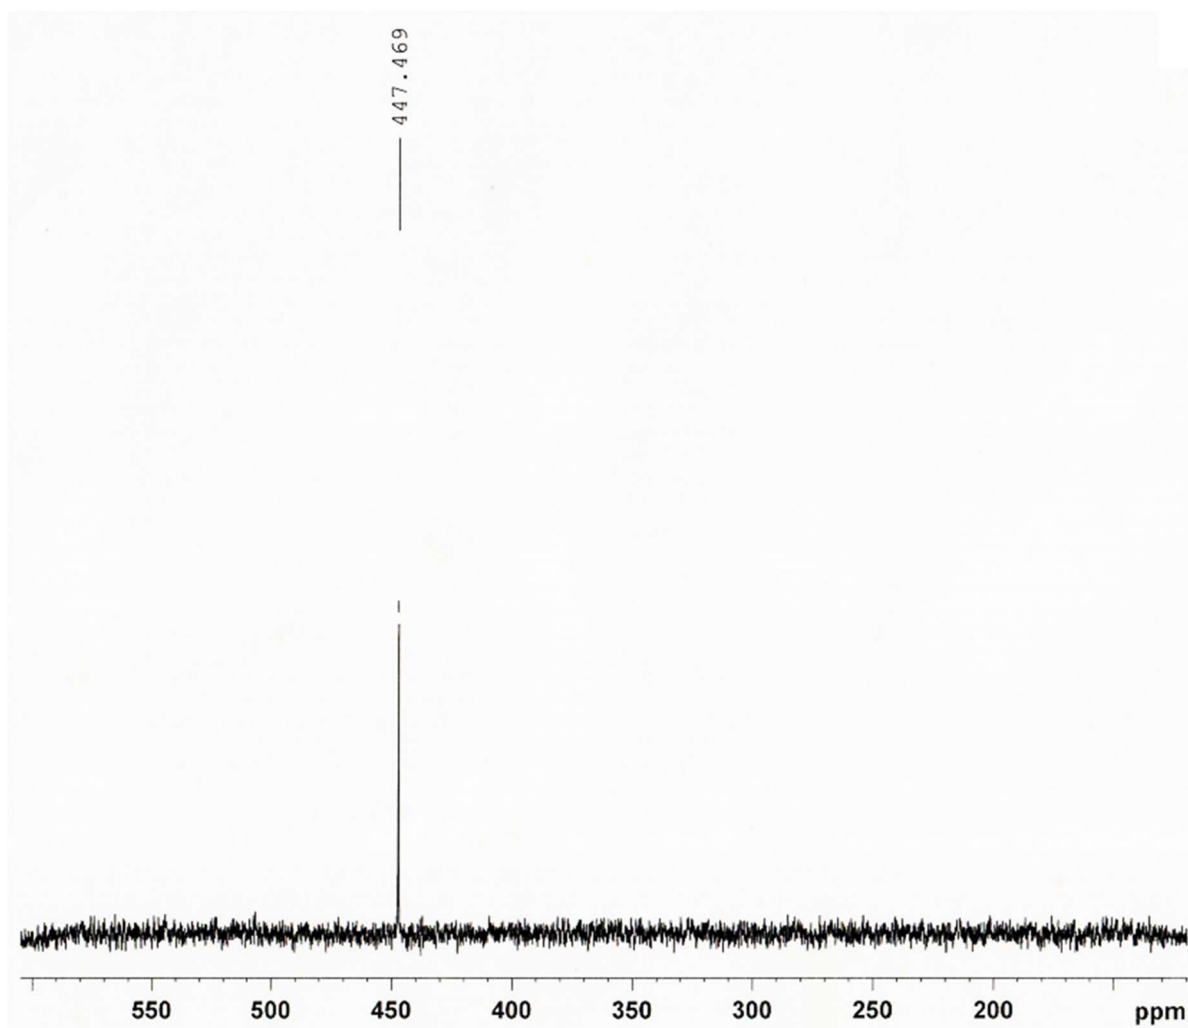

**Fig. S3.** NMR spectra ( $^{77}\text{Se}\{^1\text{H}\}$ ) of 2, 2'-diselenobis (pyridine) ( $[\text{2-C}_5\text{H}_4\text{N-Se}]_2$ )

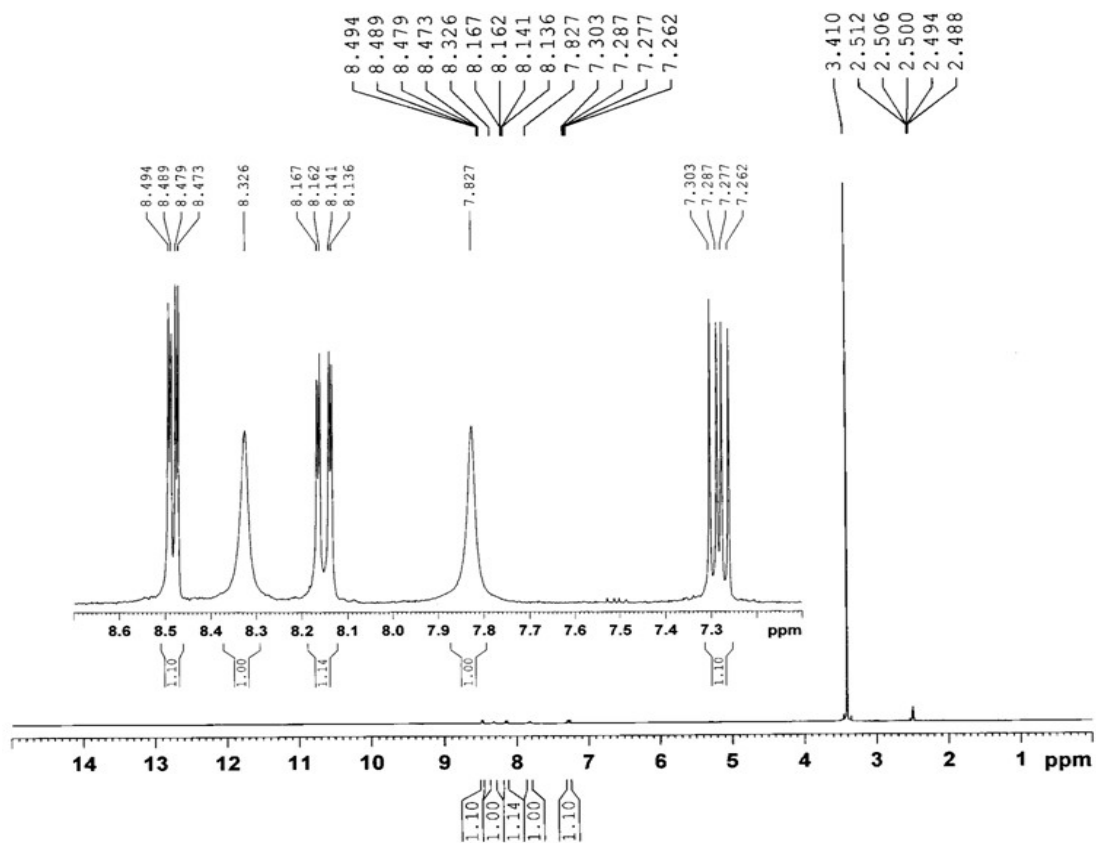

**Fig. S4.**  $^1\text{H}$  NMR spectrum of  $[2\text{-C}_5\text{H}_3\text{N}(3\text{-CONH}_2)\text{Se}]_2$  in  $\text{dms0-d}_6$

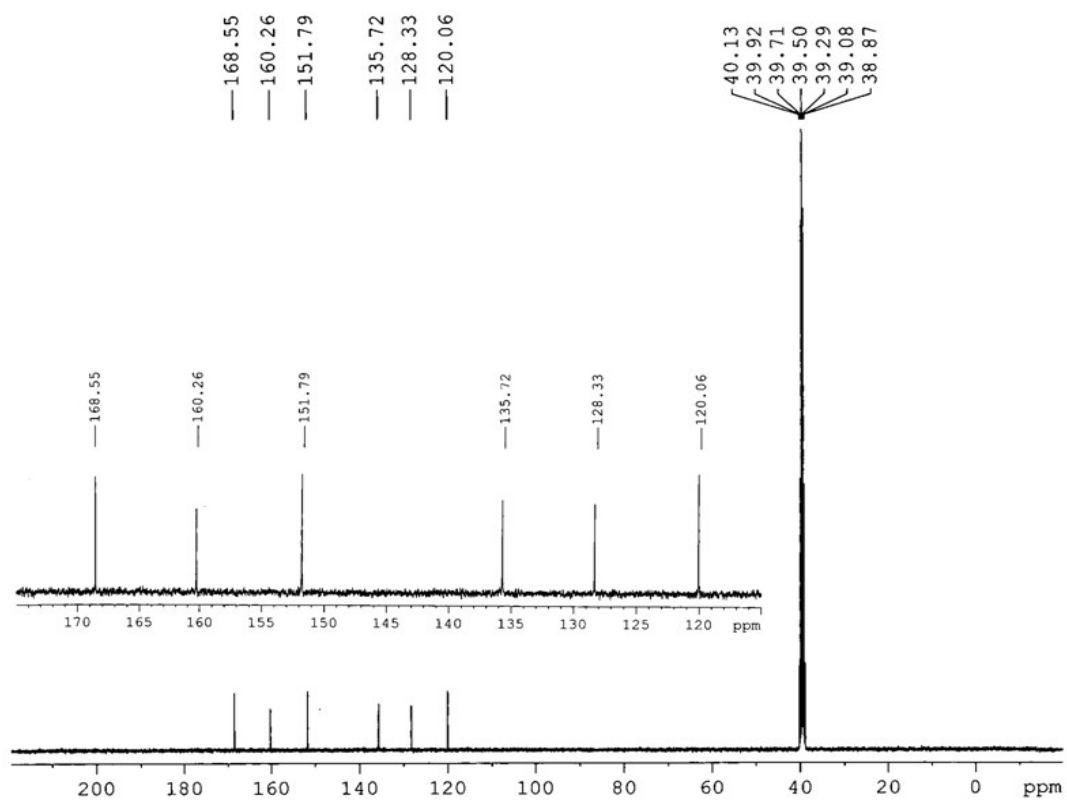

**Fig. S5.**  $^{13}\text{C}\{^1\text{H}\}$  NMR spectrum of  $[2\text{-C}_5\text{H}_3\text{N}(3\text{-CONH}_2)\text{Se}]_2$  in  $\text{dms0-d}_6$

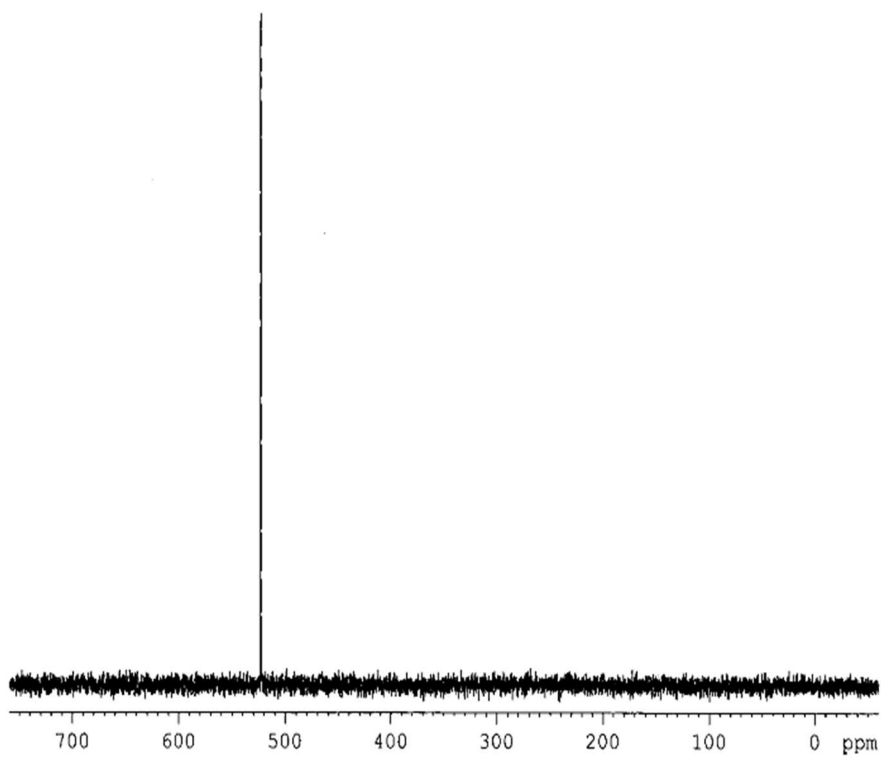

**Fig. S6.**  $^{77}\text{Se}\{^1\text{H}\}$  NMR spectrum of  $[\text{2-C}_5\text{H}_3\text{N(3-CONH}_2\text{)Se}]_2$  in  $\text{dms0-d}_6$  ( $\delta$ : 524 ppm)

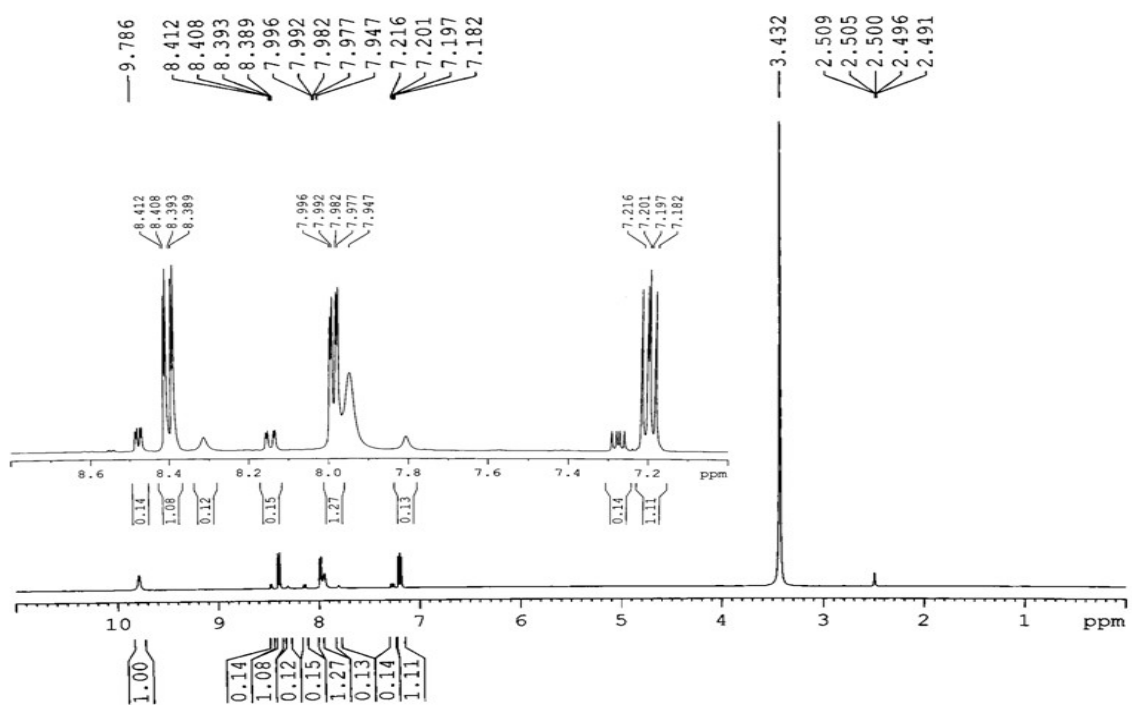

Fig. S7.  $^1\text{H}$  NMR spectrum of  $[2\text{-C}_5\text{H}_3\text{NH}(3\text{-CONH}_2)\text{Se}]$  in  $\text{dms0-d}_6$

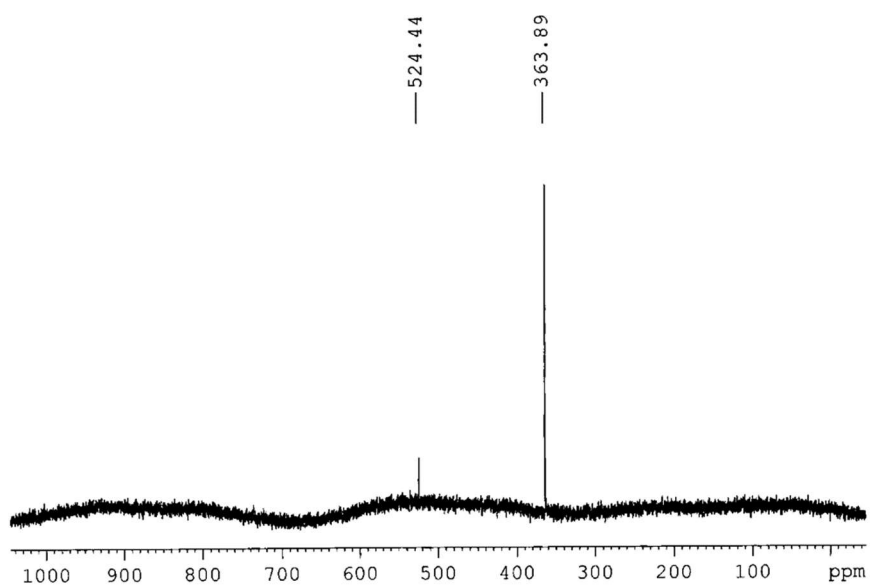

**Fig. S8.**  $^{77}\text{Se}\{^1\text{H}\}$  NMR spectrum of  $[2\text{-C}_5\text{H}_3\text{NH}(3\text{-CONH}_2)\text{Se}]$  in  $\text{dms0-d}_6$  ( $\delta$ : 364 ppm)



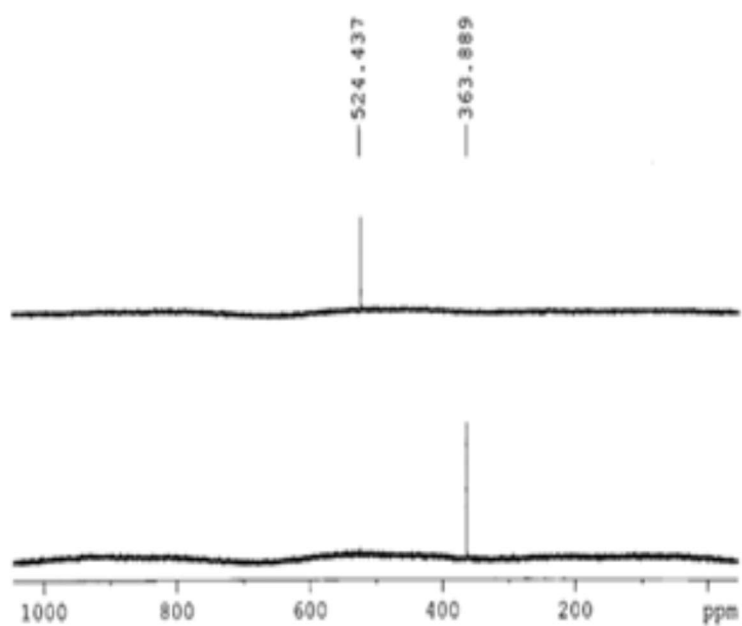

**Fig. S9.**  $^{77}\text{Se}\{^1\text{H}\}$  NMR spectra in  $\text{dms0-d}_6$  depicting conversion of  $[\text{2-C}_5\text{H}_3\text{NH(3-CONH}_2\text{)Se}]$  to  $[\text{2-C}_5\text{H}_3\text{N(3-CONH}_2\text{)Se}]_2$  by aerial oxidation

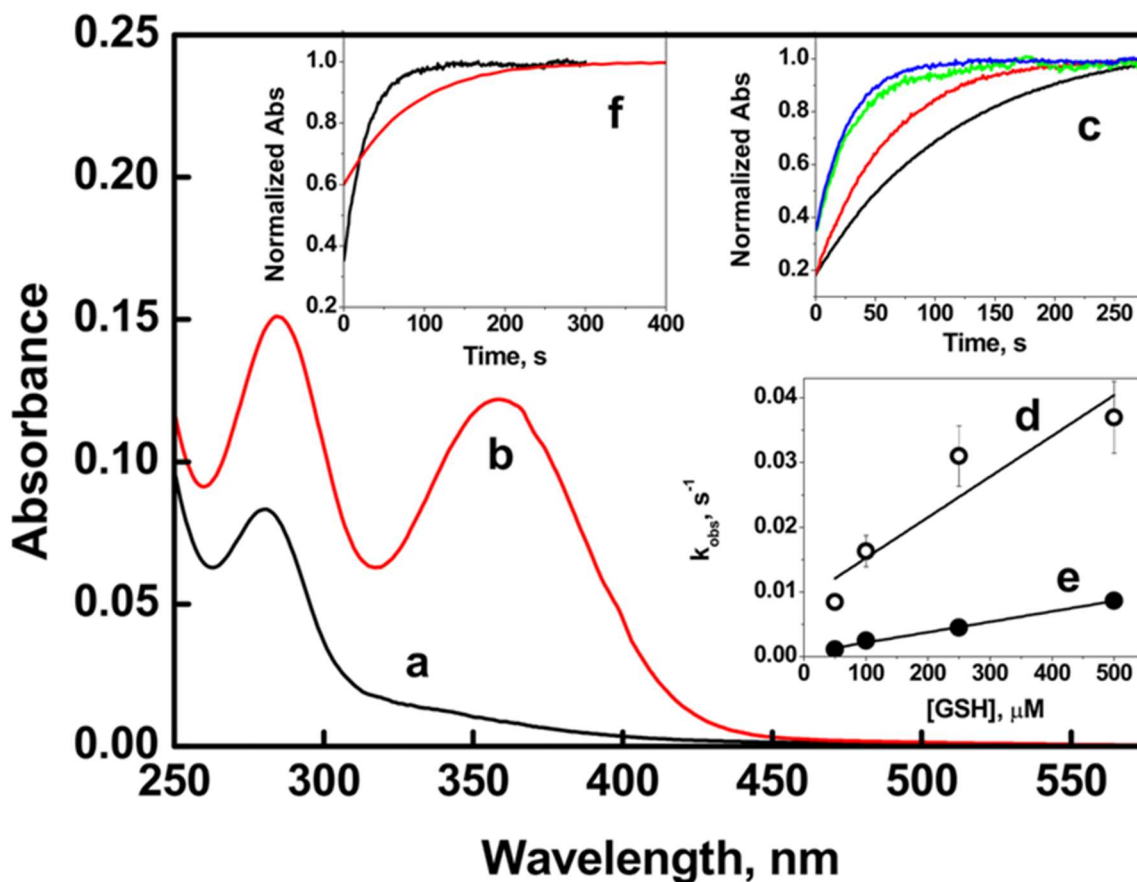

**Fig. S10.** Absorption spectrum of 10  $\mu\text{M}$  2-Py<sub>2</sub>Se<sub>2</sub> in absence (a) and presence of 1 mM GSH (b). Inset (c) shows the time dependent absorbance at 340 nm obtained on treating 10  $\mu\text{M}$  2-Py<sub>2</sub>Se<sub>2</sub> with varying concentration of GSH (0.1 – 1 mM). These plots were fitted to first order exponential growth equation in origin software (version 8.0) to obtain the observed rate ( $k_{\text{obs}}$ ). Inset (d) and (e) shows the plot of  $k_{\text{obs}}$  for 2-Py<sub>2</sub>Se<sub>2</sub> and Nict<sub>2</sub>Se<sub>2</sub> at different GSH concentration. Inset (f) shows the relative reactivity of the diselenides with 500  $\mu\text{M}$  GSH (black line = 2-Py<sub>2</sub>Se<sub>2</sub> and red line = Nict<sub>2</sub>Se<sub>2</sub>).

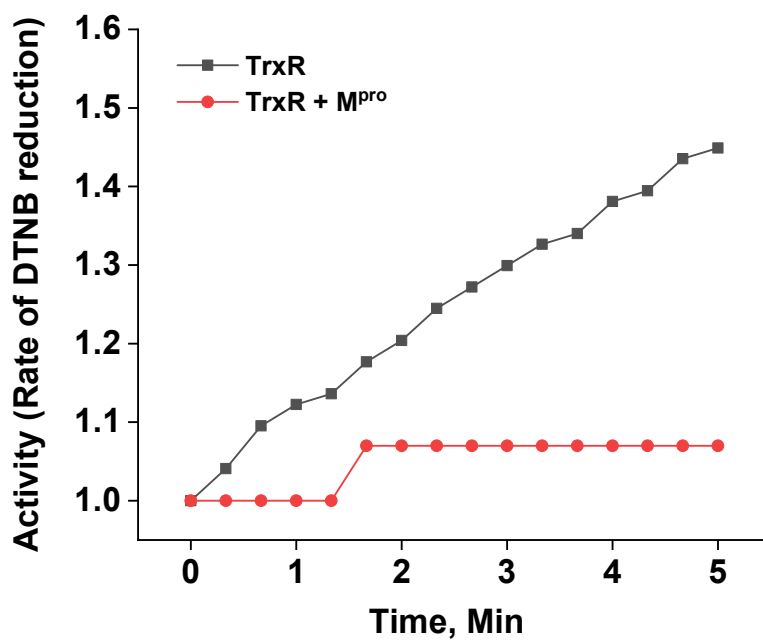

**Fig. S11.** 50 mM Phosphate-EDTA buffer pH 7.4, containing 100  $\mu$ M NADPH and 6 mM DTNB was mixed with 50 nM rat liver TrxR in presence and absence of 15 ng M<sup>pro</sup> (BPC Biosciences, Cat. no. 100823). The formation of TNB was followed by monitoring A412.
